## SHORT COMMUNICATION

# Vacuolar H<sup>+</sup>-ATPase and Na<sup>+</sup>/K<sup>+</sup>-ATPase energize Na<sup>+</sup> uptake mechanisms in the nuchal organ of the hyperregulating freshwater crustacean *Daphnia magna*

Carolyn Morris and Michael J. O'Donnell\*

## ABSTRACT

The nuchal organ of the embryos and neonates of the cladoceran, *Daphnia magna*, has been shown to be a site of Na<sup>+</sup> influx and H<sup>+</sup>, NH<sub>4</sub><sup>+</sup> and Cl<sup>-</sup> efflux. This study combines the scanning ion-selective electrode technique with application of inhibitors of specific transporters to assess the mechanisms of Na<sup>+</sup> transport across the nuchal organ. Na<sup>+</sup> influx across the nuchal organ was inhibited both by inhibitors of the Na<sup>+</sup>/K<sup>+</sup>-ATPase (ouabain, bufalin) and by inhibitors of the vacuolar H<sup>+</sup>-ATPase (bafilomycin, *N*-ethylmaleimide, 7-chloro-4-nitrobenzo-2-oxa-1,3-diazole, KM91104, S-nitrosoglutathione). Na<sup>+</sup> influx was unaffected by the epithelial Na<sup>+</sup> channel blocker benzamil, but was sensitive to ethylisopropyl amiloride and elevated external ammonium concentrations, consistent with roles for Na<sup>+</sup>/H<sup>+</sup> and Na<sup>+</sup>/NH<sub>4</sub><sup>+</sup> exchangers in the apical membrane but not Na<sup>+</sup> channels. Transport across the basolateral membrane into the haemolymph is proposed to involve the Na<sup>+</sup>/K<sup>+</sup>-ATPase and a thiazide-sensitive Na<sup>+</sup>/Cl<sup>-</sup> cotransporter.

**KEY WORDS:** Bafilomycin, Bufalin, Ion transporters, V-ATPase, Ionoregulation

## INTRODUCTION

Many species of hyperregulating adult crustaceans in fresh or brackish water typically use the gills for ionoregulatory Na<sup>+</sup> uptake (Freire et al., 2008; Kirschner, 2004). Another ionoregulatory structure, variously termed the dorsal organ, neck gland or nuchal organ, is found in a wide variety of larval and adult branchiopods, copepods and malacostracans (Martin and Laverack, 1992). The branchiopod nuchal organ contains mitochondria-rich ion transporting cells (Aladin and Potts, 1995) and has recently been shown to be the site of influx of Na<sup>+</sup> and efflux of H<sup>+</sup> and NH<sub>4</sub><sup>+</sup> in embryos and juveniles of the cladoceran *Daphnia magna* (Morris and O'Donnell, 2019). Unexpectedly, there was also a consistent efflux of Cl<sup>-</sup> (from haemolymph to water) across the nuchal organ. The latter paper (Morris and O'Donnell, 2019) suggests that Cl<sup>-</sup> efflux reflects displacement of extracellular Cl<sup>-</sup> by a surplus of other anions, including HCO<sub>3</sub><sup>-</sup>, which accumulates to levels as high as 20.9 mmol l<sup>-1</sup> in the related species *Daphnia pulex* (Weber and Pirow, 2009), and circulating amino acids, peptides and proteins, on which net negative charges are favoured by an extracellular pH of 8.33 in *D. magna* haemolymph.

The genus *Daphnia* is an established model for toxicology and studies of ionoregulatory mechanisms of the nuchal organ can provide the foundation for understanding the actions of environmental pollutants such as silver (Bianchini and Wood, 2003) in juveniles, which are known to be more sensitive to toxic metals (Hoang and Klaine, 2007). A study of <sup>22</sup>Na uptake in juvenile and adult daphnids used pharmacological tools to characterize the mechanisms involved in Na<sup>+</sup> uptake (Bianchini and Wood, 2008). Given that *D. magna* can survive in both fresh and brackish waters (Schuytema et al., 1997), the drugs tested in the earlier study (Bianchini and Wood, 2008) were chosen for the present study based on the mechanisms described for salt-transporting epithelia of hyperosmoregulating crustaceans (Kirschner, 2004; Freire et al., 2008). The concentrations of drugs tested in the present study of the nuchal organ and in the earlier whole-animal measurements (Bianchini and Wood, 2008) were selected based on concentrations that inhibit the target mechanisms in weak and strong hyperosmoregulator crustaceans, as summarized in several reviews (Freire et al., 2008; Kirschner, 2004; Onken and Riestenpatt, 1998; Pequeux, 1995).

Whole-animal studies do not distinguish between Na<sup>+</sup> uptake by the gills versus the nuchal organ. The goal of the present study was to use inhibitors of specific ion transport mechanisms, in conjunction with the scanning ion-selective electrode technique (SIET), to assess the mechanisms of Na<sup>+</sup> uptake across the nuchal organ in neonate *D. magna*.

## MATERIALS AND METHODS

*Daphnia magna* Straus were maintained at room temperature (23°C) in aerated 20 l tanks of dechlorinated Hamilton tap water (DHTW). The water was sourced from Lake Ontario, and contained (in mmol l<sup>-1</sup>): 1 Ca, 0.6 Na, 0.70 Cl, 0.3 Mg and 0.05 K, with a titration alkalinity of 2.1 mequiv l<sup>-1</sup>, hardness of ~140 mg l<sup>-1</sup> as CaCO<sub>3</sub> equivalents, and pH ~8.0 (Hollis et al., 2001; Leonard et al., 2014). *Daphnia* were fed a 2:2:1 mixture of Spirulina powder:Chlorella powder:yeast 3 times per week. Na<sup>+</sup> flux across the nuchal organ was measured in neonates staged and handled as described in an earlier publication (Morris and O'Donnell, 2019).

Methods for construction, calibration and use of Na<sup>+</sup>-selective microelectrodes with the SIET technique have been described in detail in an earlier publication (Morris and O'Donnell, 2019). Briefly, SIET measurements of Na<sup>+</sup> flux were made at the centre of the nuchal organ and at locations 20 µm anterior and posterior to the centre. At each measurement site, the Na<sup>+</sup>-selective microelectrode was moved between an inner position within 3–5 µm of the nuchal organ and an outer position 30 or 50 µm further away along a line perpendicular to the tissue surface. Replicate measurements (3) were made at each site, and the mean voltage difference between the two limits of excursion was converted into a concentration difference using the Na<sup>+</sup> microelectrode calibration curve. Na<sup>+</sup>

Department of Biology, McMaster University, Hamilton, ON, Canada, L8S 4K1.

\*Author for correspondence (odonnell@mcmaster.ca)

© M.J.O., 0000-0003-3988-6059

Received 29 December 2020; Accepted 6 May 2021

flux was estimated from the measured concentration gradients using Fick's law. Flux was measured before and after the addition of each transport inhibitor to the bathing solution. None of the compounds at the concentrations used in this study interfered with the  $\text{Na}^+$ -selective microelectrodes, with the exception of benzamil and ethyl isopropyl amiloride (EIPA). For these last two compounds, we modified the protocol developed for analysis of  $\text{Na}^+$  uptake by the mosquito anal papilla (Del Duca et al., 2011). Benzamil ( $100 \mu\text{mol l}^{-1}$  in DHTW) or EIPA ( $20 \mu\text{mol l}^{-1}$  in 0.02% dimethyl sulfoxide, DMSO) was added to the bathing solution for 15 min, the bath was then replaced with DHTW 4 times and  $\text{Na}^+$  flux was then measured in DHTW. Pharmacological reagents were obtained from Millipore Sigma (Oakville, ON, Canada).

Data are presented as means  $\pm$  s.e.m. GraphPad Prism 9 (San Diego, CA, USA) was used for graphing and statistical analyses. Significance of differences ( $P < 0.05$ ) between control and experimental values was assessed with repeated measures one-way ANOVA, as described in the figure captions.

## RESULTS AND DISCUSSION

### $\text{Na}^+/\text{K}^+$ -ATPase inhibitors

Fig. 1 shows  $\text{Na}^+$  influx (means  $\pm$  s.e.m.) before and after exposure to transport inhibitors.  $\text{Na}^+$  influx at the nuchal organ was reduced 52% by exposure to ouabain ( $1 \text{ mmol l}^{-1}$ ) for 12 min (Fig. 1A). We also assessed the effect of bufalin, a non-glycosylated bufadienolide, which is more hydrophobic than the glycosylated cardenolide ouabain and forms fewer hydrogen bonds when binding to the  $\text{Na}^+/\text{K}^+$ -ATPase. Its binding is also less sensitive than ouabain to the presence of high concentrations of  $\text{K}^+$  (Laursen et al., 2015).  $\text{Na}^+$  influx was reduced 37% by bufalin at  $5 \mu\text{mol l}^{-1}$  in 0.01% DMSO (Fig. 1B) and reduced 59% by bufalin at  $50 \mu\text{mol l}^{-1}$  in 0.1% DMSO (Fig. 1C). There was no effect of 1% DMSO on  $\text{Na}^+$  influx (Fig. S1A), and  $\text{Na}^+$  flux in the presence of DMSO was of similar magnitude to values recorded previously (Morris and O'Donnell, 2019) in DHTW alone ( $\sim 300 \text{ pmol cm}^{-2} \text{ s}^{-1}$ ).

### Vacuolar $\text{H}^+$ -ATPase inhibitors

Bafilomycin ( $20 \mu\text{mol l}^{-1}$  in 0.5% DMSO) and *N*-ethylmaleimide (NEM,  $50 \mu\text{mol l}^{-1}$  in DHTW) reduced  $\text{Na}^+$  influx by 48% (Fig. 1D) and 77% (Fig. 1E), respectively. NEM inhibits vacuolar  $\text{H}^+$ -ATPase (V-ATPase) by binding to the cysteinyl residue on the  $\text{V}_{1A}$  subunit (Bowman and Bowman, 1986), whereas bafilomycin binds to the  $\text{V}_0$  subunit c (Bowman and Bowman, 2002). The inhibitor 7-chloro-4-nitrobenzo-2-oxa-1,3-diazole (NBD-Cl) may also act as a sulfhydryl reagent with V-ATPase, rather than as a tyrosine reagent as in the eubacterial type  $\text{H}^+$ -ATPases (Moriyama and Nelson, 1987).  $\text{Na}^+$  influx was reduced 92% by NBD-Cl ( $10 \mu\text{mol l}^{-1}$  in 0.1% DMSO; Fig. 1F). *S*-Nitrosoglutathione inhibits the V-ATPase through disulfide bond formation between cysteine residues at the catalytic site (Forgac, 1999).  $\text{Na}^+$  influx was reduced 48% by *S*-nitrosoglutathione ( $200 \mu\text{mol l}^{-1}$  in DHTW; Fig. 1G). KM91104, a benzohydrazide derivative, was discovered through screening inhibitors of the interactions of the  $\alpha 3$  and  $\beta 2$  subunits of the osteoclast V-ATPase (Kartner and Manolson, 2014).  $\text{Na}^+$  influx was reduced 30% by KM91104 ( $100 \mu\text{mol l}^{-1}$  in 0.1% DMSO; Fig. 1H).

### Inhibitors of $\text{Na}^+$ channels, exchangers and cotransporters

We examined the effects of two amiloride derivatives which affect  $\text{Na}^+$  channels and  $\text{Na}^+/\text{H}^+$  exchangers (NHEs) differentially. Benzamil, a potent inhibitor of epithelial  $\text{Na}^+$  channels (Canessa et al., 1994), had no significant effect on  $\text{Na}^+$  influx ( $100 \mu\text{mol l}^{-1}$  in DHTW; Fig. 1I). By contrast,  $\text{Na}^+$  influx was reduced 44% by EIPA

( $20 \mu\text{mol l}^{-1}$  in 0.2% DMSO; Fig. 1J), an effective inhibitor of NHEs (Masereel et al., 2003).  $\text{Na}^+$  influx was reduced 28% by bumetanide ( $500 \mu\text{mol l}^{-1}$  in DHTW; Fig. 1K), an effective inhibitor of  $\text{Na}^+/\text{K}^+/\text{2Cl}^-$  cotransport. The effects of hydrochlorothiazide, an inhibitor of the  $\text{Na}^+/\text{Cl}^-$  cotransporter (de Jong et al., 2003) were tested because bumetanide, at the concentration used, can also block  $\text{Na}^+/\text{Cl}^-$  cotransport (Dørup and Clausen, 1996).  $\text{Na}^+$  influx was reduced 45% by hydrochlorothiazide ( $1 \text{ mmol l}^{-1}$  in 0.5% DMSO; Fig. 1L). Multiple studies have reported evidence for  $\text{Na}^+/\text{NH}_4^+$  exchangers in crustacean gills (Evans and Cameron, 1986) and  $\text{Na}^+$  influx at the nuchal organ is accompanied by  $\text{NH}_4^+$  efflux (Morris and O'Donnell, 2019). We therefore assessed whether  $\text{Na}^+$  influx was affected by an elevated external  $\text{NH}_4^+$  concentration that would tend to oppose  $\text{Na}^+$  influx through an apical  $\text{Na}^+/\text{NH}_4^+$  exchanger.  $\text{Na}^+$  influx was reduced 44% by the addition of  $10 \text{ mmol l}^{-1}$   $\text{NH}_4\text{Cl}$  to the water (Fig. 1M).

### Effects of treatments altering anion transport

$\text{Na}^+$  influx at the nuchal organ was reduced 73% by the  $\text{Cl}^-$  channel blocker diphenylamine-2-carboxylic acid, (DPC;  $1 \text{ mmol l}^{-1}$  in 0.5% ethanol; Fig. 1N). There was no effect of the vehicle ethanol (0.5%) on  $\text{Na}^+$  influx (Fig. S1B). We also examined the effects of the carbonic anhydrase (CA) inhibitor acetazolamide, as interference with  $\text{HCO}_3^-$  production might alter  $\text{Na}^+$  influx through transporters such as the  $\text{Na}^+$ -dependent  $\text{Cl}^-/\text{HCO}_3^-$  exchanger, or through secondary effects following reduced supply of  $\text{H}^+$  for the V-ATPase.  $\text{Na}^+$  influx was reduced 58% by acetazolamide ( $1 \text{ mmol l}^{-1}$  in 0.5% DMSO; Fig. 1O).

### A model of $\text{Na}^+$ transport

The results are summarized in a working model of  $\text{Na}^+$  transport across the nuchal organ (Fig. 2). We suggest that  $\text{Na}^+$  influx is driven by the actions of two ATPases. Inhibition of  $\text{Na}^+$  influx by ouabain and bufalin is consistent with the presence of a basolateral  $\text{Na}^+/\text{K}^+$ -ATPase. Our proposal of an apical V-ATPase is based on the effects of multiple inhibitors: bafilomycin, NEM, NBD-Cl, KM91104 and *S*-nitrosoglutathione. The previous study of  $^{22}\text{Na}$  uptake by whole neonates also proposed an apical location for the V-ATPase based on inhibition of  $\text{Na}^+$  uptake by  $0.5 \mu\text{mol l}^{-1}$  bafilomycin (Bianchini and Wood, 2008). Our preliminary measurements indicated inconsistent effects of bafilomycin A1 at  $5 \mu\text{mol l}^{-1}$  (data not shown), and we therefore assessed the effects of the drug at  $20 \mu\text{mol l}^{-1}$ . The difference in bafilomycin A1 sensitivity between the present and earlier study may reflect effects of the drug at the gill versus the nuchal organ. Differences in the thickness and/or composition of the cuticle overlying the nuchal organ may present a more significant diffusion barrier to bafilomycin A1 access to the nuchal organ relative to the gill. This difference in bafilomycin A1 sensitivity prompted us to measure the effects of the other V-ATPase inhibitors. NEM is typically used at a concentration of  $1 \text{ mmol l}^{-1}$  (Lin and Randall, 1993) but we found 77% inhibition of  $\text{Na}^+$  influx at a concentration of  $50 \mu\text{mol l}^{-1}$ . Similarly, NBD-Cl causes half-maximal inhibition of V-ATPase driven short circuit current in tobacco hornworm midgut at  $100\text{--}200 \mu\text{mol l}^{-1}$  (Schirmanns and Zeiske, 1994), and we found 92% inhibition of  $\text{Na}^+$  influx at  $10 \mu\text{mol l}^{-1}$  NBD-Cl. It is important to point out that precise comparisons in the effectiveness of different drugs in terms of their percentage inhibition are difficult in the absence of measured  $\text{IC}_{50}$  values for each compound. Our goal in this study was to use inhibitors to confirm the likely presence or absence of particular transporters in the nuchal organ, for which  $\text{Na}^+$  transport characteristics have not previously been determined.

In the classic frog skin model of  $\text{Na}^+$  uptake across a tight epithelium, the role of the apical V-ATPase is to drive  $\text{Na}^+$

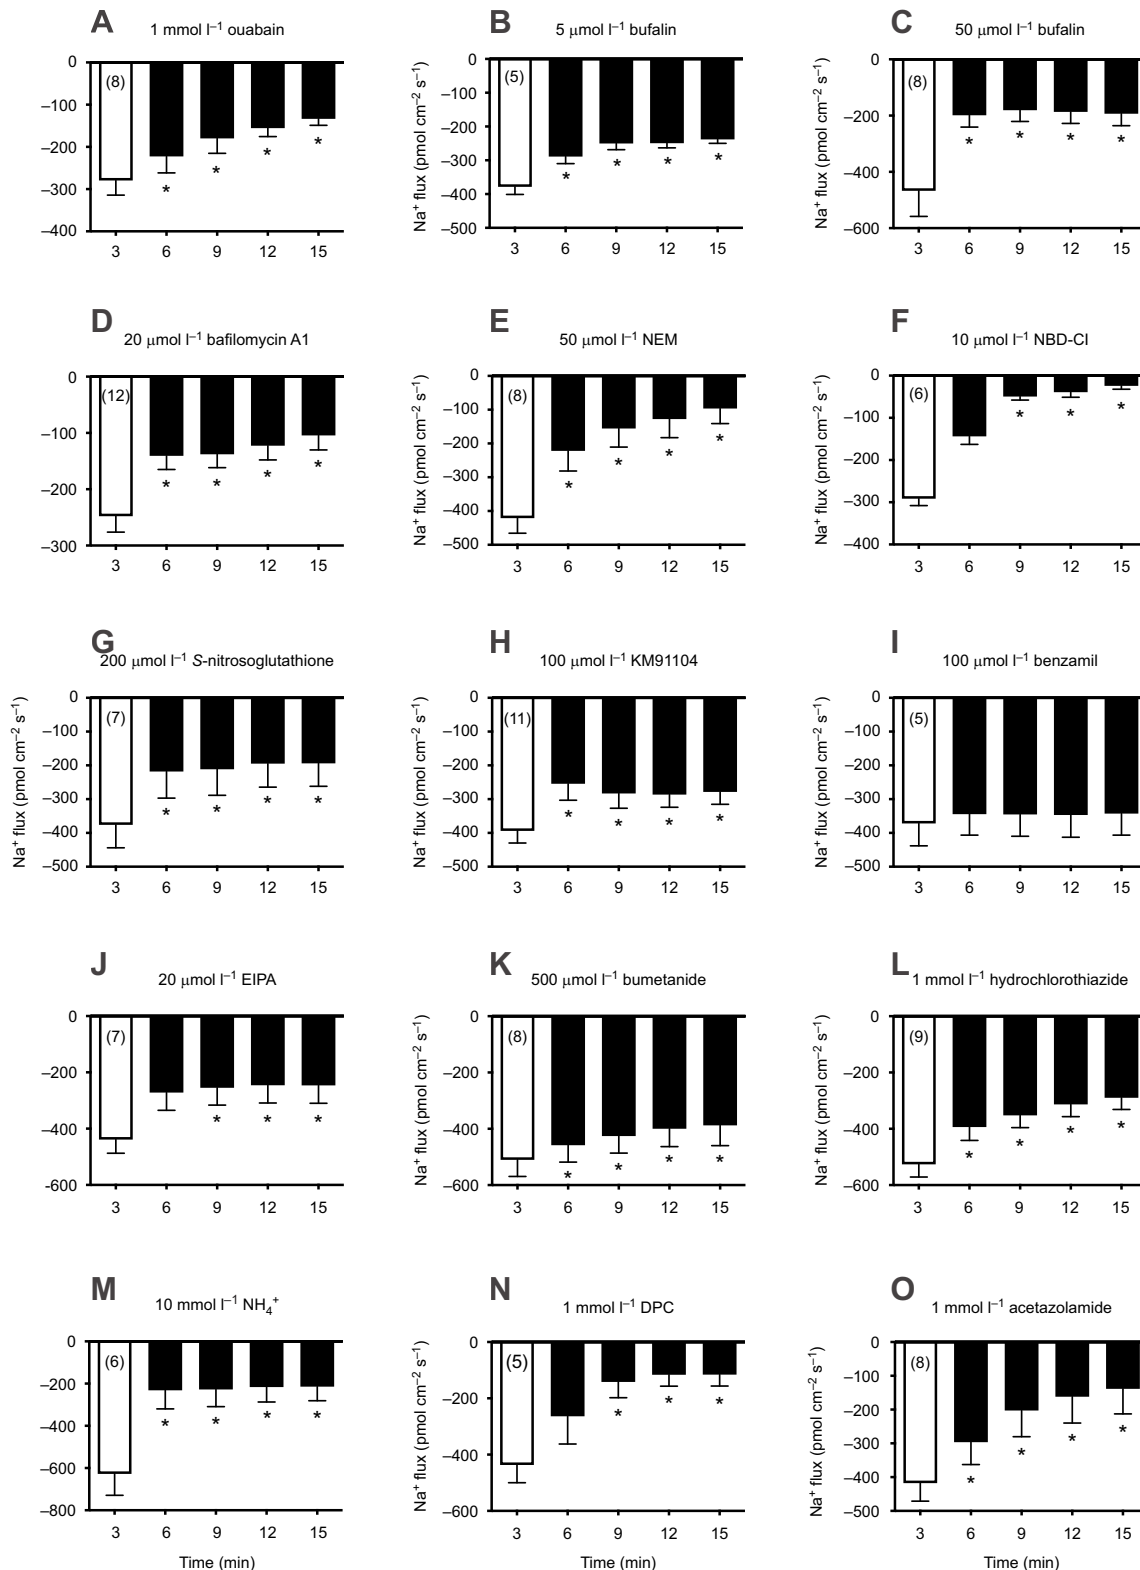

**Fig. 1. Na<sup>+</sup> influx (mean ± s.e.m.) in response to transport inhibitors.** (A–C) Na<sup>+</sup>/K<sup>+</sup>-ATPase inhibitors; (D–H) vacuolar H<sup>+</sup>-ATPase inhibitors (NEM, *N*-ethylmaleimide; NBD-Cl, 7-chloro-4-nitrobenzo-2-oxa-1,3-diazole); (I–M) Na<sup>+</sup> channel, exchanger and cotransporter inhibitors (EIPA, ethyl isopropyl amiloride); (N,O) anion transport inhibitors (DPC, diphenylamine-2-carboxylic acid). Open bars represent the control Na<sup>+</sup> influx for *Daphnia magna* neonates bathed in dechlorinated Hamilton tap water. The indicated concentration of the inhibitor was then added at 3 min and flux was measured at 6, 9, 12 and 15 min. Data in A–E and G–M passed normality tests and were analysed using one-way repeated measures ANOVA and Dunnett's *post hoc* test. Data for F failed normality tests and were analysed using Friedman's non-parametric ANOVA and Dunn's *post hoc* multiple comparisons test. Asterisks denote significant ( $P < 0.05$ ) differences between control ( $t = 3$  min; open bars) and experimental ( $t = 6–15$  min; filled bars) values. Number of animals is indicated in parentheses in the control bar.

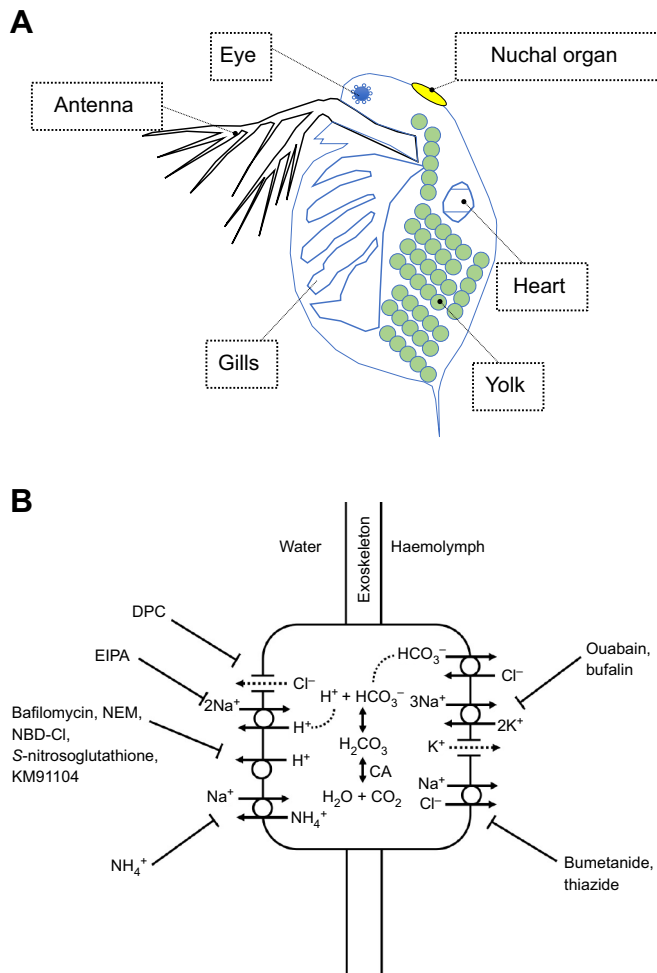

**Fig. 2. Working model of ion transport across the nuchal organ of neonate *D. magna*.** (A) Schematic diagram of a neonate, showing the location of the nuchal organ in relation to the other morphological features. (B) The nuchal organ is the site of influx of  $\text{Na}^+$  and efflux of  $\text{H}^+$ ,  $\text{NH}_4^+$  and  $\text{Cl}^-$ . Inhibitors of specific transporters are noted.

uptake from low concentrations in the water through  $\text{Na}^+$  channels in response to the inside-negative apical membrane potential generated by the V-ATPase (Harvey, 1992). We found no effect of the epithelial  $\text{Na}^+$  channel blocker benzamil on  $\text{Na}^+$  influx across the nuchal organ, whereas  $^{22}\text{Na}^+$  uptake by whole neonates is reduced by the related compound phenamil (Bianchini and Wood, 2008). This may reflect a more significant role for  $\text{Na}^+$  channels in the neonate gill, whereas  $\text{Na}^+/\text{H}^+$  exchange inhibitable by EIPA is more important at the nuchal organ.  $\text{Na}^+$  uptake through the latter transport pathway would be sensitive to reduced activity of the electrogenic V-ATPase if the exchanger stoichiometry is also electrogenic ( $2\text{Na}^+/\text{H}^+$ ), as reported in previous studies of  $\text{Na}^+$  transport in adult *Daphnia* (Glover and Wood, 2005) and other crustaceans (e.g. Ahearn et al., 2001). It is important to note that the neonates were pre-exposed to benzamil and EIPA in our study and the flux recorded after the drugs were washed off, because of interference of benzamil and EIPA with  $\text{Na}^+$ -selective microelectrodes. Rapid reversal of channel blockade by benzamil could thus explain our results, although such rapid reversal was not seen with EIPA in this study, nor with phenamil, a compound related to benzamil, in a previous study of  $\text{Na}^+$  transport across the anal papillae of freshwater chironomids (Del Duca et al., 2011).

$\text{Na}^+$  influx across the nuchal organ is reduced by elevation of  $[\text{NH}_4^+]$  in the water, consistent with the presence of a  $\text{Na}^+/\text{NH}_4^+$  exchange mechanism (Fig. 2B). Such exchangers have been reported in many crustaceans (Evans and Cameron, 1986). An alternative explanation is diffusion of  $\text{NH}_3$  outward across the gill followed by diffusion trapping with  $\text{H}^+$  supplied by the V-ATPase (Weihrauch and O'Donnell, 2015). Both diffusion trapping and  $\text{Na}^+/\text{NH}_4^+$  exchange would be opposed by high concentrations of  $\text{NH}_4^+$  in the external boundary layer at the nuchal organ.

Inhibition of  $\text{Na}^+$  influx across the nuchal organ by hydrochlorothiazide and bumetanide is consistent with the earlier study of  $^{22}\text{Na}^+$  uptake by whole neonates (Bianchini and Wood, 2008). Our model proposes a basolateral location for a  $\text{Na}^+/\text{Cl}^-$  cotransporter (Fig. 2B), as does the previous study.

Our finding that acetazolamide inhibits  $\text{Na}^+$  influx across the nuchal organ is consistent with inhibition of net uptake of  $^{22}\text{Na}^+$  in whole neonates and adults by acetazolamide (Bianchini and Wood, 2008). Interference with production of  $\text{H}^+$  by CA presumably reduces transport across both V-ATPase and the proposed  $2\text{Na}^+/\text{H}^+$  exchanger. There is a substantive difference between our model of nuchal organ  $\text{Na}^+$  transport and the  $\text{Na}^+$  uptake model presented by the earlier whole-animal study (Bianchini and Wood, 2008) with regards to  $\text{Cl}^-$  transport. The earlier model proposed  $\text{Cl}^-$  uptake by whole animals, whereas our study of the nuchal organ of embryos and neonates revealed a consistent efflux of  $\text{Cl}^-$  (Morris and O'Donnell, 2019). We have therefore proposed a basolateral  $\text{Cl}^-/\text{HCO}_3^-$  exchanger that transports  $\text{Cl}^-$  from haemolymph to cytoplasm of the nuchal organ cells in exchange from CA-generated  $\text{HCO}_3^-$ . Export of  $\text{HCO}_3^-$  into the haemolymph is consistent with the high concentrations of  $\text{HCO}_3^-$  in the haemolymph in the related species *D. pulex* (Weber and Pirow, 2009). We suggest that an apical  $\text{Cl}^-$  channel sensitive to DPC mediates transfer of  $\text{Cl}^-$  from cell to water, and that the inhibitory effects of DPC on  $\text{Na}^+$  influx are thus indirect. Accumulation of  $\text{Cl}^-$  in the cells of the nuchal organ in response to DPC will tend to suppress  $\text{HCO}_3^-$  transfer to the haemolymph, with resulting end-product inhibition of the generation of  $\text{HCO}_3^-$  and  $\text{H}^+$  by CA and a consequent reduction in V-ATPase activity.

Early life stages of many aquatic organisms including crustaceans such as *D. magna* are well known to be more sensitive than adults to toxicants (Mohammed, 2013). The nuchal organ is the primary means for pH and ionoregulation before development of the gills, gut and renal organs, and further studies of this tissue may aid identification of the effects of toxicants on specific ion transport pathways in a single transporting epithelium in this important bioindicator species.

#### Competing interests

The authors declare no competing or financial interests.

#### Author contributions

Conceptualization: C.M., M.J.O.; Methodology: M.J.O.; Formal analysis: C.M., M.J.O.; Investigation: C.M., M.J.O.; Data curation: M.J.O.; Writing - original draft: C.M., M.J.O.; Writing - review & editing: C.M., M.J.O.; Supervision: M.J.O.; Project administration: M.J.O.; Funding acquisition: M.J.O.

#### Funding

This study was supported by Natural Sciences and Engineering Research Council of Canada (NSERC) Discovery Grants to M.J.O. (RGPIN-2015-05359).

#### References

- Ahearn, G. A., Mandal, P. K. and Mandal, A. (2001). Biology of the  $2\text{Na}^+/\text{H}^+$  antiporter in invertebrates. *J. Exp. Zool.* **289**, 232–244. doi:10.1002/1097-010X(20010401/30)289:4<232::AID-JEZ4>3.0.CO;2-T
- Aladin, N. V. and Potts, W. T. W. (1995). Osmoregulatory capacity of the Cladocera. *J. Comp. Physiol. B* **164**, 671–683. doi:10.1007/BF00389810



- Bianchini, A. and Wood, C. M.** (2003). Mechanism of acute silver toxicity in *Daphnia magna*. *Environ. Toxicol. Chem.* **22**, 1361-1367. doi:10.1002/etc.5620220624
- Bianchini, A. and Wood, C. M.** (2008). Sodium uptake in different life stages of crustaceans: the water flea *Daphnia magna* Strauss. *J. Exp. Biol.* **211**, 539-547. doi:10.1242/jeb.009175
- Bowman, B. J. and Bowman, E. J.** (1986). H<sup>+</sup>-ATPases from mitochondria, plasma membranes, and vacuoles of fungal cells. *J. Membr. Biol.* **94**, 83-97. doi:10.1007/BF01871190
- Bowman, B. J. and Bowman, E. J.** (2002). Mutations in subunit C of the vacuolar ATPase confer resistance to bafilomycin and identify a conserved antibiotic binding site. *J. Biol. Chem.* **277**, 3965-3972. doi:10.1074/jbc.M109756200
- Canessa, C. M., Schild, L., Buell, G., Thorens, B., Gautschi, I., Horisberger, J.-D. and Rossier, B. C.** (1994). Amiloride-sensitive epithelial Na<sup>+</sup> channel is made of three homologous subunits. *Nature* **367**, 463-467. doi:10.1038/367463a0
- de Jong, J. C., Willems, P. H. G. M., Mooren, F. J. M., van den Heuvel, L. P. W. J., Knoers, N. V. A. M. and Bindels, R. J. M.** (2003). The structural unit of the thiazide-sensitive NaCl cotransporter is a homodimer. *J. Biol. Chem.* **278**, 24302-24307. doi:10.1074/jbc.M303101200
- Del Duca, O., Nasirian, A., Galperin, V. and Donini, A.** (2011). Pharmacological characterisation of apical Na<sup>+</sup> and Cl<sup>-</sup> transport mechanisms of the anal papillae in the larval mosquito *Aedes aegypti*. *J. Exp. Biol.* **214**, 3992-3999. doi:10.1242/jeb.063719
- Dörup, I. and Clausen, T.** (1996). Characterization of bumetanide-sensitive Na<sup>+</sup> and K<sup>+</sup> transport in rat skeletal muscle. *Acta Physiol. Scand.* **158**, 119-127. doi:10.1046/j.1365-201X.1996.542296000.x
- Evans, D. H. and Cameron, J. N.** (1986). Gill ammonia transport. *J. Exp. Zool.* **239**, 17-23. doi:10.1002/jez.1402390104
- Forgac, M.** (1999). The vacuolar H<sup>+</sup>-ATPase of clathrin-coated vesicles is reversibly inhibited by S-nitrosoglutathione. *J. Biol. Chem.* **274**, 1301-1305. doi:10.1074/jbc.274.3.1301
- Freire, C. A., Onken, H. and McNamara, J. C.** (2008). A structure-function analysis of ion transport in crustacean gills and excretory organs. *Comp. Biochem. Physiol. Part A: Mol. Integr. Physiol.* **151**, 272-304. doi:10.1016/j.cbpa.2007.05.008
- Glover, C. N. and Wood, C. M.** (2005). Physiological characterisation of a pH- and calcium-dependent sodium uptake mechanism in the freshwater crustacean, *Daphnia magna*. *J. Exp. Biol.* **208**, 951-959. doi:10.1242/jeb.01426
- Harvey, B. J.** (1992). Energization of sodium absorption by the H(+)-ATPase pump in mitochondria-rich cells of frog skin. *J. Exp. Biol.* **172**, 289-309. doi:10.1242/jeb.172.1.289
- Hoang, T. C. and Klaire, S. J.** (2007). Influence of organism age on metal toxicity to *Daphnia magna*. *Environ. Toxicol. Chem.* **26**, 1198-1204. doi:10.1897/06-515R.1
- Hollis, L., Hogstrand, C. and Wood, C. M.** (2001). Tissue-specific cadmium accumulation, metallothionein induction, and tissue zinc and copper levels during chronic sublethal cadmium exposure in juvenile rainbow trout. *Arch. Environ. Contam. Toxicol.* **41**, 468-474. doi:10.1007/s002440010273
- Kartner, N. and Manolson, M. F.** (2014). Novel techniques in the development of osteoporosis drug therapy: the osteoclast ruffled-border vacuolar H<sup>+</sup>-ATPase as an emerging target. *Expert Opin. Drug Discov.* **9**, 505-522. doi:10.1517/17460441.2014.902155
- Kirschner, L. B.** (2004). The mechanism of sodium chloride uptake in hyperregulating aquatic animals. *J. Exp. Biol.* **207**, 1439-1452. doi:10.1242/jeb.00907
- Laursen, M., Gregersen, J. L., Yatime, L., Nissen, P. and Fedosova, N. U.** (2015). Structures and characterization of digoxin- and ouabain-bound Na<sup>+</sup>/K<sup>+</sup>-ATPase compared with the ouabain-bound complex. *Proc. Natl. Acad. Sci.* **112**, 1755-1760. doi:10.1073/pnas.1422997112
- Leonard, E. M., Banerjee, U., D'Silva, J. J. and Wood, C. M.** (2014). Chronic nickel bioaccumulation and sub-cellular fractionation in two freshwater teleosts, the round goby and the rainbow trout, exposed simultaneously to waterborne and dietborne nickel. *Aquat. Toxicol.* **154**, 141-153. doi:10.1016/j.aquatox.2014.04.028
- Lin, H. and Randall, D. J.** (1993). H<sup>+</sup>-ATPase activity in crude homogenates of fish gill tissue: inhibitor sensitivity and environmental and hormonal regulation. *J. Exp. Biol.* **180**, 163-174. doi:10.1242/jeb.180.1.163
- Martin, J. W. and Laverack, M. S.** (1992). On the distribution of the crustacean dorsal organ. *Acta Zool.* **73**, 357-368. doi:10.1111/j.1463-6395.1992.tb01108.x
- Masereel, B., Pochet, L. and Laeckmann, D.** (2003). An overview of inhibitors of Na<sup>+</sup>/H<sup>+</sup> exchanger. *Eur. J. Med. Chem.* **38**, 547-554. doi:10.1016/S0223-5234(03)00100-4
- Mohammed, A.** (2013). Why are early life stages of aquatic organisms more sensitive to toxicants than adults? In *New Insights into Toxicity and Drug Testing* (ed. S. J. T. Gowder), pp. 49-62. InTechOpen.
- Moriyama, Y. and Nelson, N.** (1987). Nucleotide binding sites and chemical modification of the chromaffin granule proton ATPase. *J. Biol. Chem.* **262**, 14723-14729. doi:10.1016/S0021-9258(18)47855-6
- Morris, C. and O'Donnell, M.** (2019). Multiple functions of ion transport by the nuchal organ in embryos and neonates of the freshwater branchiopod crustacean *Daphnia magna*. *J. Exp. Biol.* **222**, jeb211128. doi:10.1242/jeb.211128
- Onken, H. and Riestenpatt, S.** (1998). NaCl absorption across split gill lamellae of hyperregulating crabs: transport mechanisms and their regulation. *Comp. Biochem. Physiol. Part A: Mol. Integr. Physiol.* **119**, 883-893. doi:10.1016/S1095-6433(98)00020-8
- Pequeux, A.** (1995). Osmotic regulation in crustaceans. *J. Crustacean Biol.* **15**, 1-60. doi:10.2307/1549010
- Schirmanns, K. and Zeiske, W.** (1994). An investigation of the midgut K<sup>+</sup> pump of the Tobacco Hornworm (*Manduca sexta*) using specific inhibitors and amphotericin B. *J. Exp. Biol.* **188**, 191-204. doi:10.1242/jeb.188.1.191
- Schuytema, G. S., Nebeker, A. V. and Stutzman, T. W.** (1997). Salinity tolerance of *Daphnia magna* and potential use for estuarine sediment toxicity tests. *Arch. Environ. Contam. Toxicol.* **33**, 194-198. doi:10.1007/s002449900242
- Weber, A. K. and Pirow, R.** (2009). Physiological responses of *Daphnia pulex* to acid stress. *BMC Physiol.* **9**, 9. doi:10.1186/1472-6793-9-9
- Weihrauch, D. and O'Donnell, M. J.** (2015). Links between osmoregulation and nitrogen-excretion in insects and crustaceans. *Integr. Comp. Biol.* **55**, 816-829. doi:10.1093/icb/icc013
